# Supplementary material for: The Use of Honey for Cicatrization and Pain Control of Obstetric Wounds: A Systematic Review and Meta-Analysis of Randomized Controlled Trials
Source: MDPI journal article supplement (doi:10.3390/nu16020185), 2024-01-05
Supplement: s1 [file s1]

## Supplementary Data

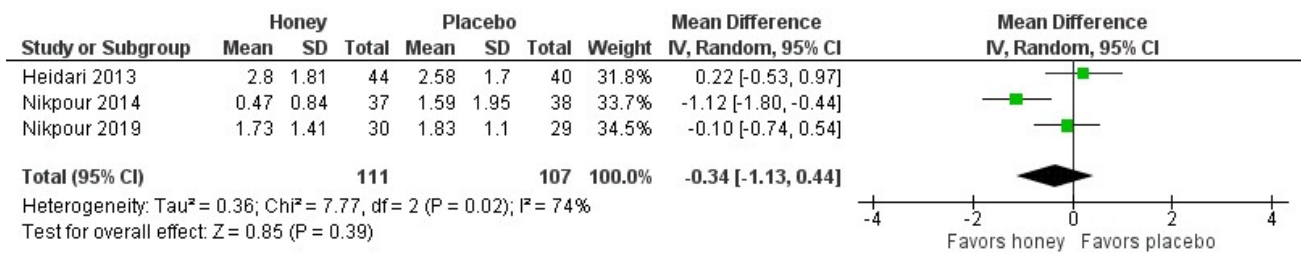

**Figure S1 - Wound Healing;** (MD 0.34; 95% CI -1.13 to 0.44;  $p=0.39$ )

**Table S1 - Combined analysis of outcomes**

| Study /year   | Pain relief drugs (%) | Antibiotic (%) | Diet*  | Satisfaction (%) and p-value | Wound complications <sup>a</sup> ( comparison) |
|---------------|-----------------------|----------------|--------|------------------------------|------------------------------------------------|
| Gerosa 2022   |                       |                |        |                              |                                                |
| Mel           | 46.43 %               | NA             | diet   | 93%                          | Mean VAS urinary burning ( $p = 0.31$ )        |
| Placebo       | 54.84%                | NA             | advice | NA                           |                                                |
| Heidari 2013  |                       |                |        |                              |                                                |
| Mel           | NA                    | NA             | diet   | Not significant              | Not significant difference                     |
| Placebo       | NA                    | NA             | advice | difference                   |                                                |
| Nikpour 2014  |                       |                |        |                              |                                                |
| Mel           | NA                    | 89%            | diet   | 86% ( $p<0,001$ )            | Rednees ( $p< 0.003$ )                         |
| Placebo       | NA                    | 94%            | advice | 26%                          | Edema ( $p = 0.010$ )                          |
|               |                       |                |        |                              | Ecchymosed ( $p = 0.006$ )                     |
| Nikpour 2019  |                       |                |        |                              |                                                |
| Mel           | 50%                   | 73.3%          | NA     | NA                           | Tingling and itching ( $p = 0.921$ )           |
| Placebo       | 72.4%                 | 82.8%          | NA     | NA                           |                                                |
| Shirvani 2013 |                       |                |        |                              |                                                |
| Mel           | 11,5% <sup>b</sup>    | NA             | diet   | 61% ( $p<0,001$ )            | Burn ( $p = 0.13$ )                            |
|               |                       |                | advice |                              | Pruritis ( $p = 0.13$ )                        |
| Placebo       | 62,6% <sup>b</sup>    | NA             |        | 17,01%                       | Redness ( $p = 0.001$ )                        |
|               |                       |                |        |                              | Warming ( $p = 0.003$ )                        |

NA, not available; \* milk, meat, fruits, vegetables and cereals intake; <sup>a</sup> always evaluated on the last day of treatment; <sup>b</sup> first 10 days.

| Studies                                          | Estimate (95% C.I.)         | Ev/Trt       |
|--------------------------------------------------|-----------------------------|--------------|
| Gerosa 2022                                      | 0.931 (0.839, 1.000)        | 27/29        |
| Nikpour 2019                                     | 0.867 (0.745, 0.988)        | 26/30        |
| Shirvani 2013                                    | 0.622 (0.465, 0.778)        | 23/37        |
| <b>Overall (I<sup>2</sup>=82.16 % , P=0.004)</b> | <b>0.816 (0.651, 0.982)</b> | <b>76/96</b> |

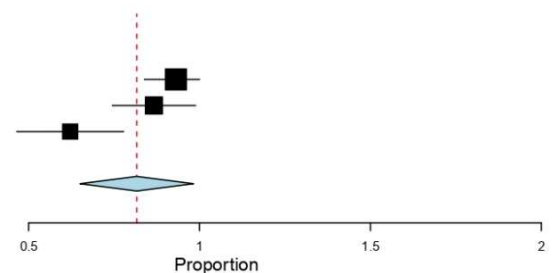

**Figure S2 – Proportion of Personal satisfaction;** (OR 0.81; 95% CI 0.61, 0.98;  $I^2=82.16$ )

**Table S2** - Statistical analysis of the outcomes of interest.

| OUTCOMES                             | STUDIES | N <sup>a</sup> OF PATIENTS | MD OR SMD | 95% IC         | P-VALUE | CHI <sup>2</sup> | HETEROGENEITY DF | P-VALUE | I <sup>2</sup> (%) |
|--------------------------------------|---------|----------------------------|-----------|----------------|---------|------------------|------------------|---------|--------------------|
| Wound healing (middle of treatment)  | 2       | 134                        | - 0.84    | - 2.23, 0.55   | 0.24    | 4.21             | 1                | 0.04    | 76%                |
| Wound healing (end of treatment)     | 3       | 218                        | - 0.34    | - 1.13, 0.44   | 0.39    | 7.77             | 2                | 0.02    | 74%                |
| Pain intensity (24 h)                | 3       | 217                        | 0.11      | - 0.15, 0.38   | 0.40    | 1.09             | 2                | 0.58    | 0%                 |
| Pain intensity (middle of treatment) | 3       | 191                        | - 0.54    | - 0.83, - 0.25 | 0.0003* | 0.42             | 2                | 0.81    | 0%                 |
| Pain intensity (end of treatment)    | 3       | 218                        | - 0.71    | - 1.92, 0.49   | 0.24    | 6.94             | 2                | 0.03    | 71%                |

\* Statistically significant. MD, mean difference; SMD, standardized mean difference; CI, confidence interval;

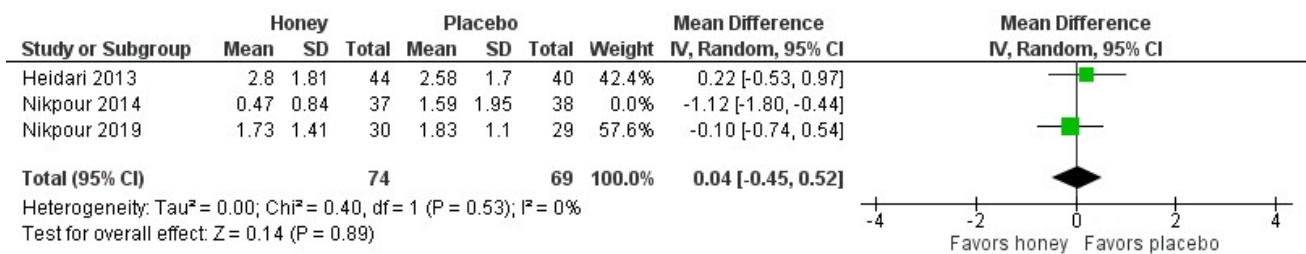

**Figure S3** – Wound Healing one out analysis; (MD 0.04; 95% CI -0.45 to 0.52;  $p=0.89$ )

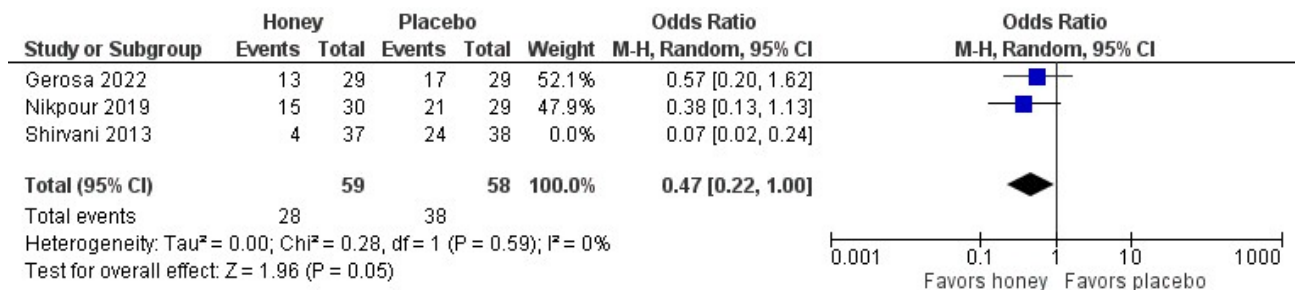

**Figure S4** – Use of NSAIDs for pain control one out analysis; (OR 0.47; 95% CI 0.22, 1.00;  $p<0.005$ )

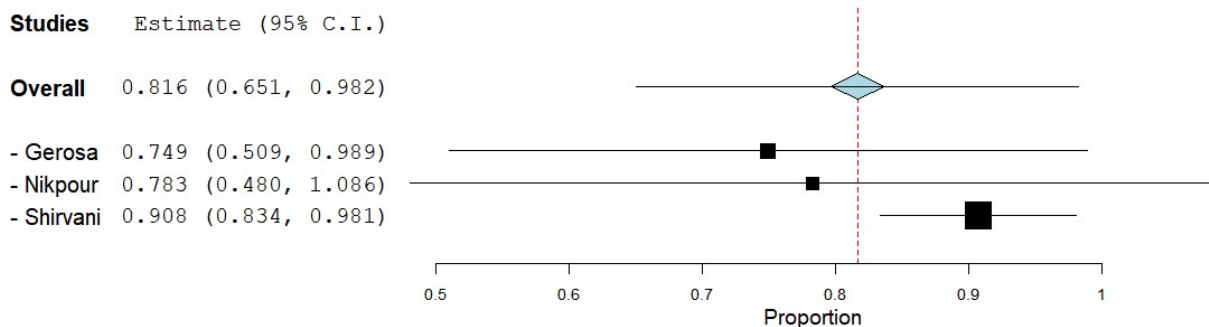

**Figure S5** – Personal satisfaction one out analysis; (OR 0.81; 95% CI 0.65, 0.98;)
